# Supplementary material for: Involvement of PSMD10, CDK4, and Tumor Suppressors in Development of Intrahepatic Cholangiocarcinoma of Syrian Golden Hamsters Induced by Clonorchis sinensis and N-Nitrosodimethylamine
Source: PLoS Negl Trop Dis. 2015 Aug 27;9(8):e0004008. doi: 10.1371/journal.pntd.0004008 (PMC4551803; doi:10.1371/journal.pntd.0004008)
Supplement: S3 Table — (XLSX) [file pntd.0004008.s006.xlsx]

## Sheet: Gene expressions qPCR
Expression of genes_SYBR green I_qPCR
2^ddcT method
Genes/Groups:	Ctrl.	Cs	NDMA	Cs+NDMA-N	Cs+NDMA-T
PSMD10	1	0.812252	1.45397	1.71713	4.25748
	1	1.51572	2.05623	0.68302	7.1602
	1	2.62079	1.29235	1.18921	2.41162
	1	1.6245	0.895025	1.09429	1.1487
	1	2.58471	0.726986	0.510506	3.05252
p16	1	6.1475	0.133046	7.88986	21.4813
	1	8.75435	1.72907	4.1308	40.2244
	1	1.41421	1.53688	6.54846	36.7171
	1	5.38893	2.15846	4.7454	19.5622
	1	9.78112	3.18215	6.23332	18.9981
CDK4	1	4.31691	1.50525	1.28915	6.6807
	1	2.86791	0.50698	5.09824	9.18959
	1	9.51366	0.376312	3.55537	7.11074
	1	4.72397	2.90795	1.07923	11.6318
	1	6.45313	3.81055	5.39729	1.58008
p53	1	0.68302	1.98618	0.673617	0.773782
	1	1.38511	1.49485	0.566442	0.0102374
	1	1.10957	25.2813	0.400535	0.234881
	1	2.56685	19.9733	0.397768	0.0429857
	1	0.907519	28.443	0.76313	0.266093
Akt/PKB	1	2.36199	5.38893	5.85854	3.98618
	1	1.32869	3.07375	8.09157	2.22099
	1	5.9794	6.10504	2.9897	35.0174
	1	2.12874	0.353553	0.133046	7.55686
	1	10.3388	3.03143	2.75535	0.746585
RB1	1	0.363493	1.52626	1.26576	0.570382
	1	0.632878	3.5801	0.0490365	0.888843
	1	5.6962	0.97942	3.11666	3.38698
	1	0.429283	8	1.06437	1.90528
	1	5.65685	2.56685	4.16986	0.473029
BAX	1	0.877153	1.01442	1.17697	0.390135
	1	1.31573	1.89753	0.832471	0.234005
	1	0.396223	0.763942	0.527801	0.527801
Caspase 9	1	1.81837	1.02389	1.32156	0.153672
	1	0.653791	0.42412	1.04912	0.487631
	1	1.13404	1.38921	1.79329	0.230835
