# Supplementary material for: Involvement of PSMD10, CDK4, and Tumor Suppressors in Development of Intrahepatic Cholangiocarcinoma of Syrian Golden Hamsters Induced by Clonorchis sinensis and N-Nitrosodimethylamine
Source: PLoS Negl Trop Dis. 2015 Aug 27;9(8):e0004008. doi: 10.1371/journal.pntd.0004008 (PMC4551803; doi:10.1371/journal.pntd.0004008)
Supplement: S5 Table — (XLSX) [file pntd.0004008.s008.xlsx]

## Sheet: Metaplastic change in groups
Metaplastic changes among different groups of hamster
Group(s):	Ctrl.	Cs	NDMA	Cs+NDMA
	0	100	0	2
	0	10	0	1
	0	0	200	0
	0	0	0	1
	0	0	0	2
	0	10	0	5
	0	0	10	2
	0	0	0	0
	0	0	25	0
	0	25	10	1
	0	0	0	2
	0	0	0	3
	0	25	0	4
	0	0	0	5
	0	0	0	5
	0	0	0	6
	0	1	0	1
	0	0	0	4
	0	0	0	2
	0	0	0	1
	0	0	0	4
	0	0	0	4
	0	0	50	4
		0	0	3
		0	0	2
		0	0	3
		50	0	1
		0	0	2
		10	25	0
		0	0	0
		0	10	0
		0	0	0
		25	0	50
		10	0	0
		20	0	0
		50	0	0
		0	25	25
		0		0
		0		0
		0		0
				50
				100
				50
				50
				50
				100
				100
				50
				50
				50
				50
				50
				100
				50
				100
				100
				50
				0
				50
				100
				100
				0
				100
				0
				10
				50
				100
				100
				100
				100
				200
				200
				200
				100
				100
				0
				50
				25
				200
				0
				0
				0
				0
				50
				200
				200
				500
				0
				50
				1
				50
				200
				0
				50
				100
				200
				200
				50
				50
				0
				50
				10
				500
				50
				25
				0
				50
				10
				100
				200
				10
				50
				100
				50
				200
MEAN	0	8.4	9.59459	56.4
SEM	0	3.0857	5.56621	7.91699
